# Supplementary material for: Piezochromism and anomalous near-infrared luminescence evolution of BaCuSi4O10 and BaCuSi2O6via pressure-induced phase transition
Source: Royal Society of Chemistry journal article supplement (doi:10.1039/d3tc02915h), 2023-01-01
Supplement: d3tc02915h1.pdf [file d3tc02915h1.pdf]

## Supporting Information

# Piezochromism and Anomalous Near-Infrared Luminescence Evolution of BaCuSi<sub>4</sub>O<sub>10</sub> and BaCuSi<sub>2</sub>O<sub>6</sub> via Pressure-Induced Phase Transition

Ke Liu,<sup>a</sup> Chen Li,<sup>a</sup> Dequan Jiang,<sup>b</sup> Yingying Ma,<sup>a</sup> Ting Wen,<sup>\*a</sup> Binbin Yue<sup>a</sup> and Yonggang Wang<sup>b</sup>

<sup>a</sup>Center for High Pressure Science and Technology Advanced Research (HPSTAR), Beijing 100193, China.

<sup>b</sup>School of Materials Science and Engineering, Peking University, Beijing 100871, China.

\* E-mail: ting.wen@hpstar.ac.cn

**Figure S1.** Rietveld refinement results of BaCuSi<sub>4</sub>O<sub>10</sub> powder XRD patterns at ambient condition.

**Figure S2.** Rietveld refinement results of BaCuSi<sub>2</sub>O<sub>6</sub> powder XRD patterns at ambient condition.

**Figure S3.** NIR emission spectra of BaCuSi<sub>4</sub>O<sub>10</sub> and BaCuSi<sub>2</sub>O<sub>6</sub> at ambient condition.

**Figure S4.** The decay time of BaCuSi<sub>4</sub>O<sub>10</sub> and BaCuSi<sub>2</sub>O<sub>6</sub> at ambient condition.

**Figure S5.** NIR emission spectra of BaCuSi<sub>4</sub>O<sub>10</sub> at 0.3 GPa and after pressure release.

**Figure S6.** NIR emission spectra of BaCuSi<sub>2</sub>O<sub>6</sub> at 0.4 GPa and after pressure release.

**Figure S7.** LeBail fitting results of BaCuSi<sub>4</sub>O<sub>10</sub> at (a) 0.2 GPa, (b) 3.1 GPa, and (c) 17.3 GPa.

**Figure S8.** XRD patterns of BaCuSi<sub>4</sub>O<sub>10</sub> at 0.2 GPa and after pressure release.

**Figure S9.** The Raman spectra of BaCuSi<sub>4</sub>O<sub>10</sub> at 0.4 GPa and after pressure release.

**Figure S10.** LeBail fitting results of BaCuSi<sub>2</sub>O<sub>6</sub> at (a) 0.2 GPa, (b) 14.7 GPa.

**Figure S11.** (a) *In situ* HP cell parameters of BaCuSi<sub>2</sub>O<sub>6</sub> under selected pressure, and (b) the cell volume as a function of applied pressure.

**Figure S12.** *in situ* HP Raman spectra of BaCuSi<sub>2</sub>O<sub>6</sub>.

**Figure S13.** XRD patterns of BaCuSi<sub>2</sub>O<sub>6</sub> at 0.2 GPa and after pressure release.

**Figure S14.** The Raman spectra of BaCuSi<sub>2</sub>O<sub>6</sub> at 0.3 GPa and after pressure release.

**Figure S15.** Optical photos of BaCuSi<sub>2</sub>O<sub>6</sub> during compression.

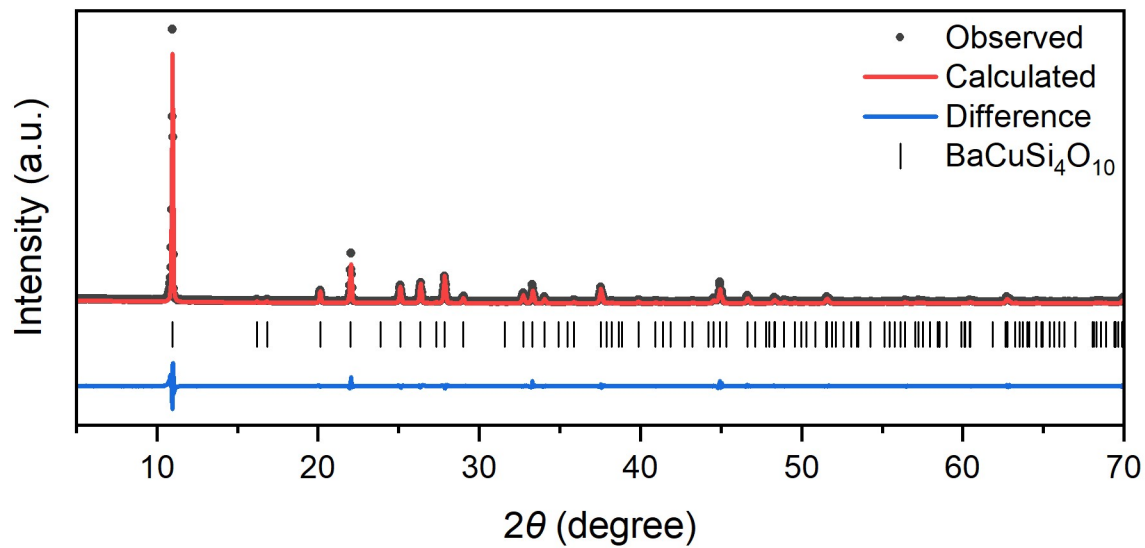

**Figure S1.** Rietveld refinement results of BaCuSi<sub>4</sub>O<sub>10</sub> powder XRD patterns at ambient condition.

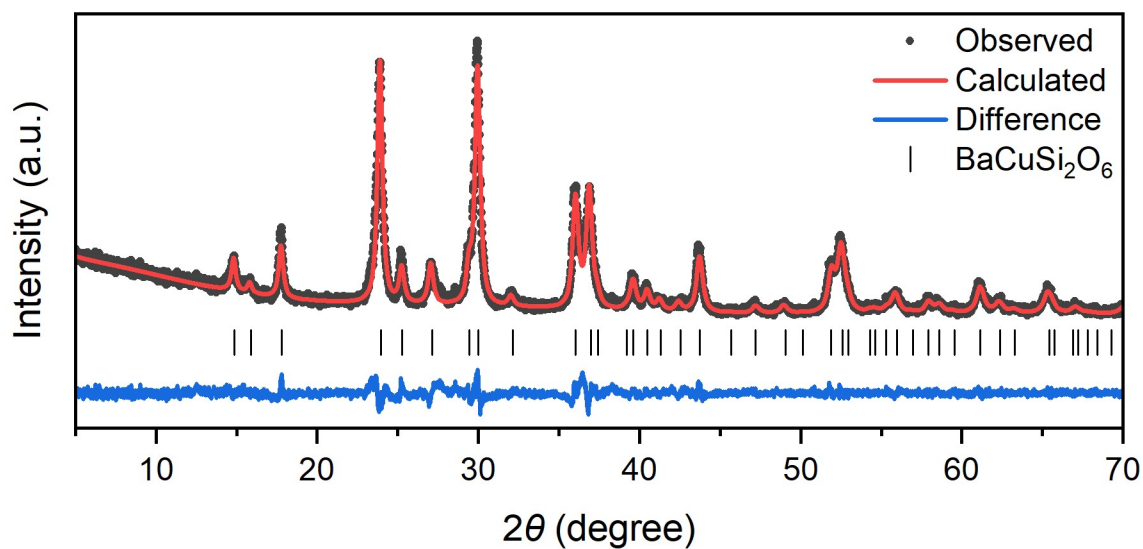

**Figure S2.** Rietveld refinement results of BaCuSi<sub>2</sub>O<sub>6</sub> powder XRD patterns at ambient condition.

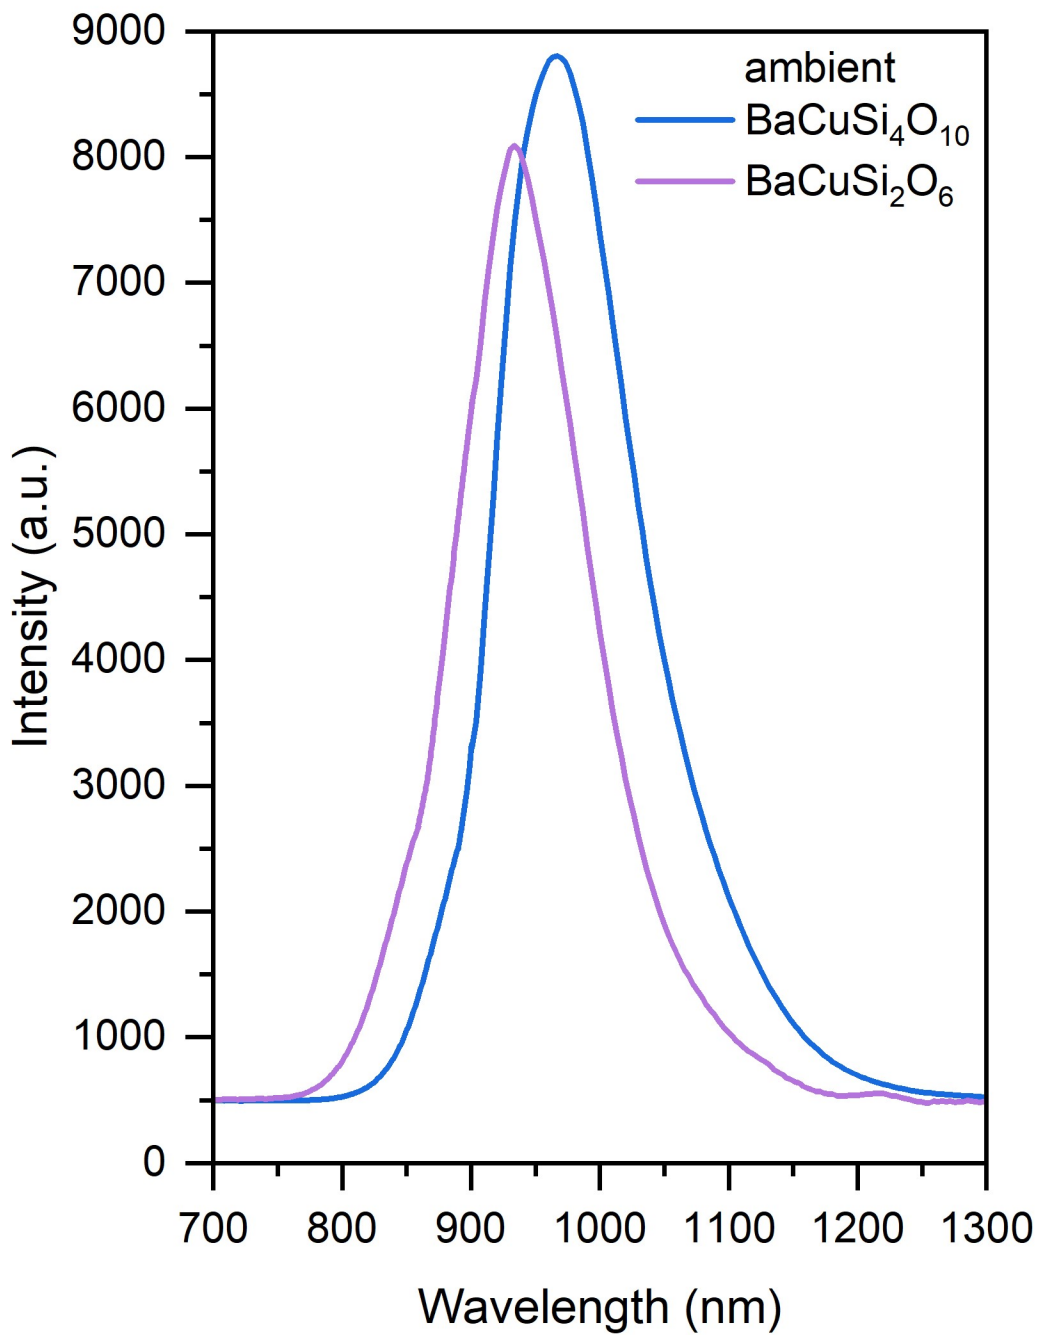

**Figure S3.** NIR emission spectra of BaCuSi<sub>4</sub>O<sub>10</sub> and BaCuSi<sub>2</sub>O<sub>6</sub> at ambient condition.

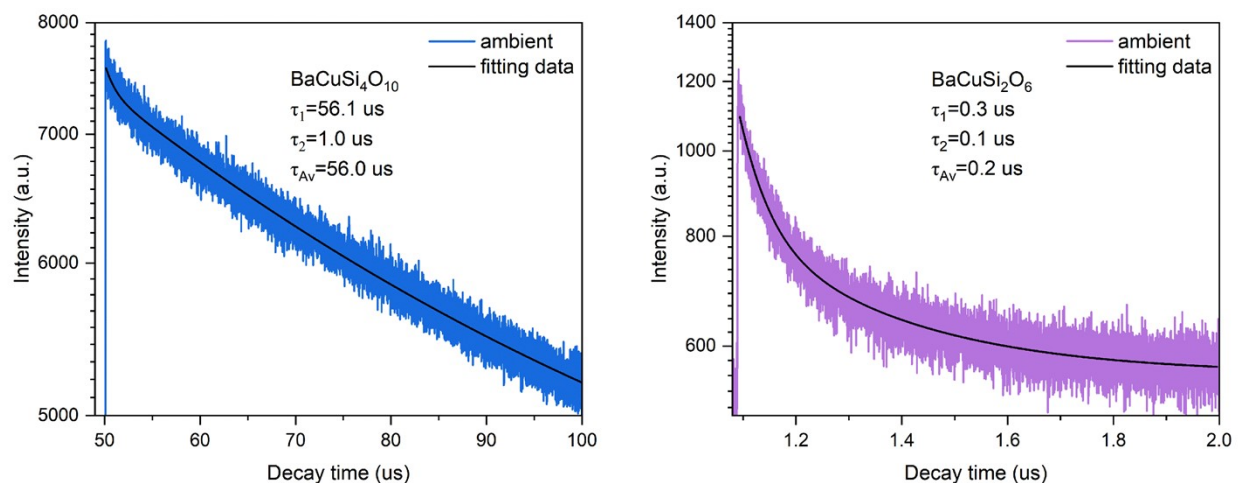

**Figure S4.** The decay time of BaCuSi<sub>4</sub>O<sub>10</sub> and BaCuSi<sub>2</sub>O<sub>6</sub> at ambient condition.

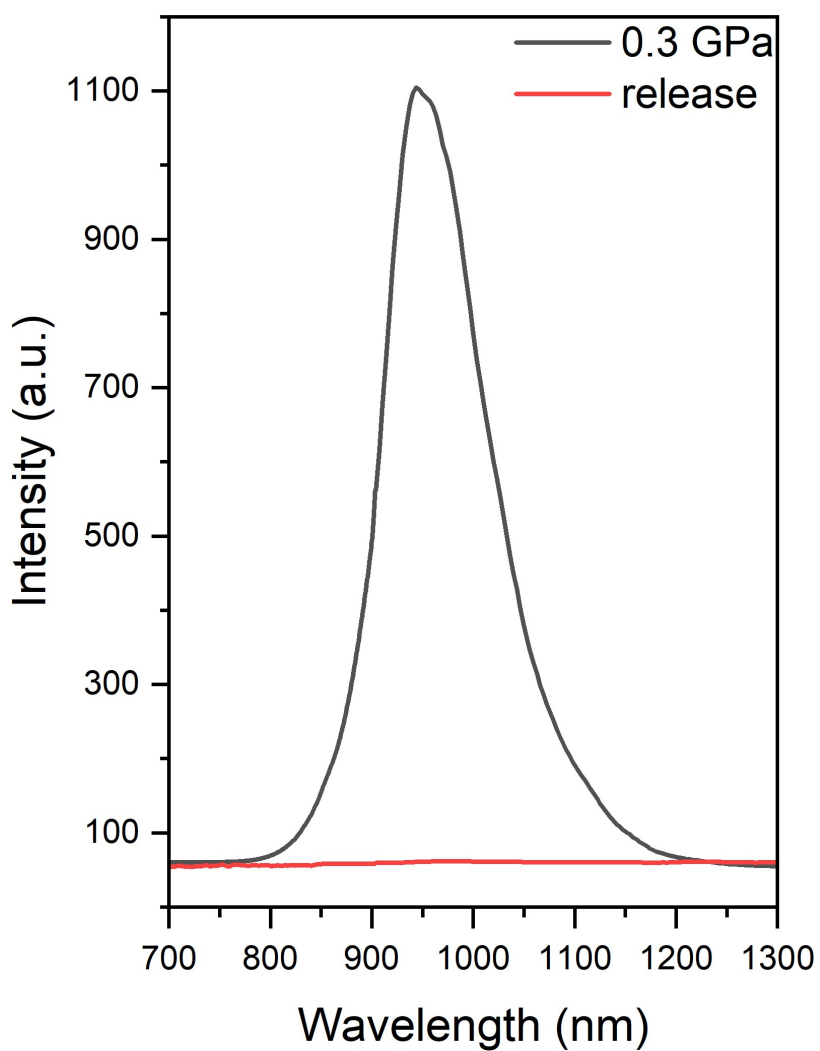

**Figure S5.** NIR emission spectra of BaCuSi<sub>4</sub>O<sub>10</sub> at 0.3 GPa and after pressure release.

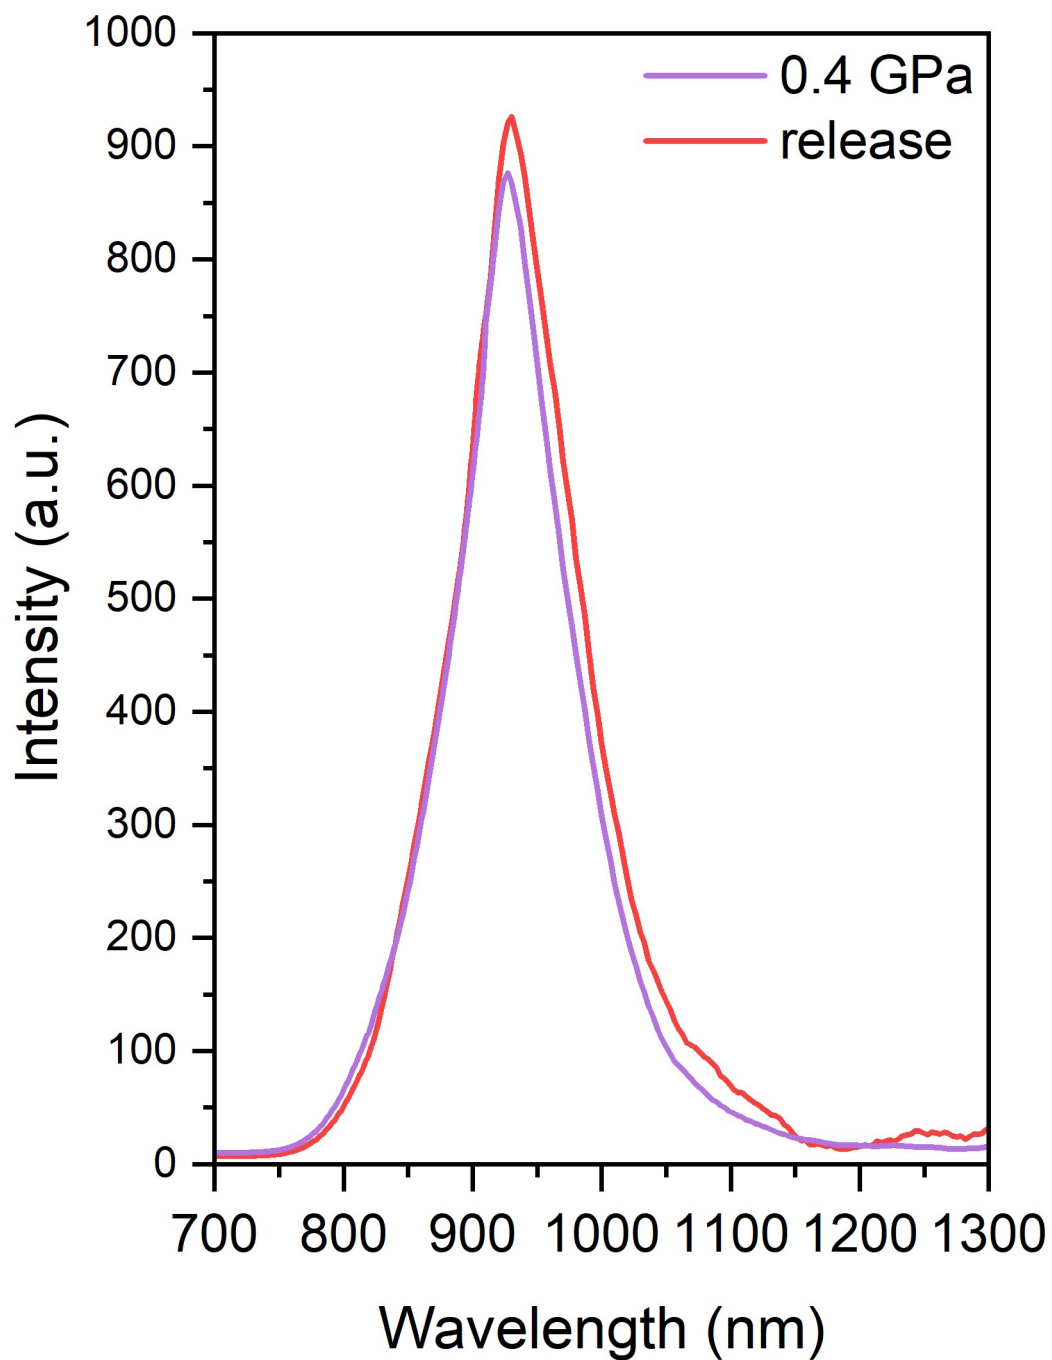

**Figure S6.** NIR emission spectra of BaCuSi<sub>2</sub>O<sub>6</sub> at 0.4 GPa and after pressure release.

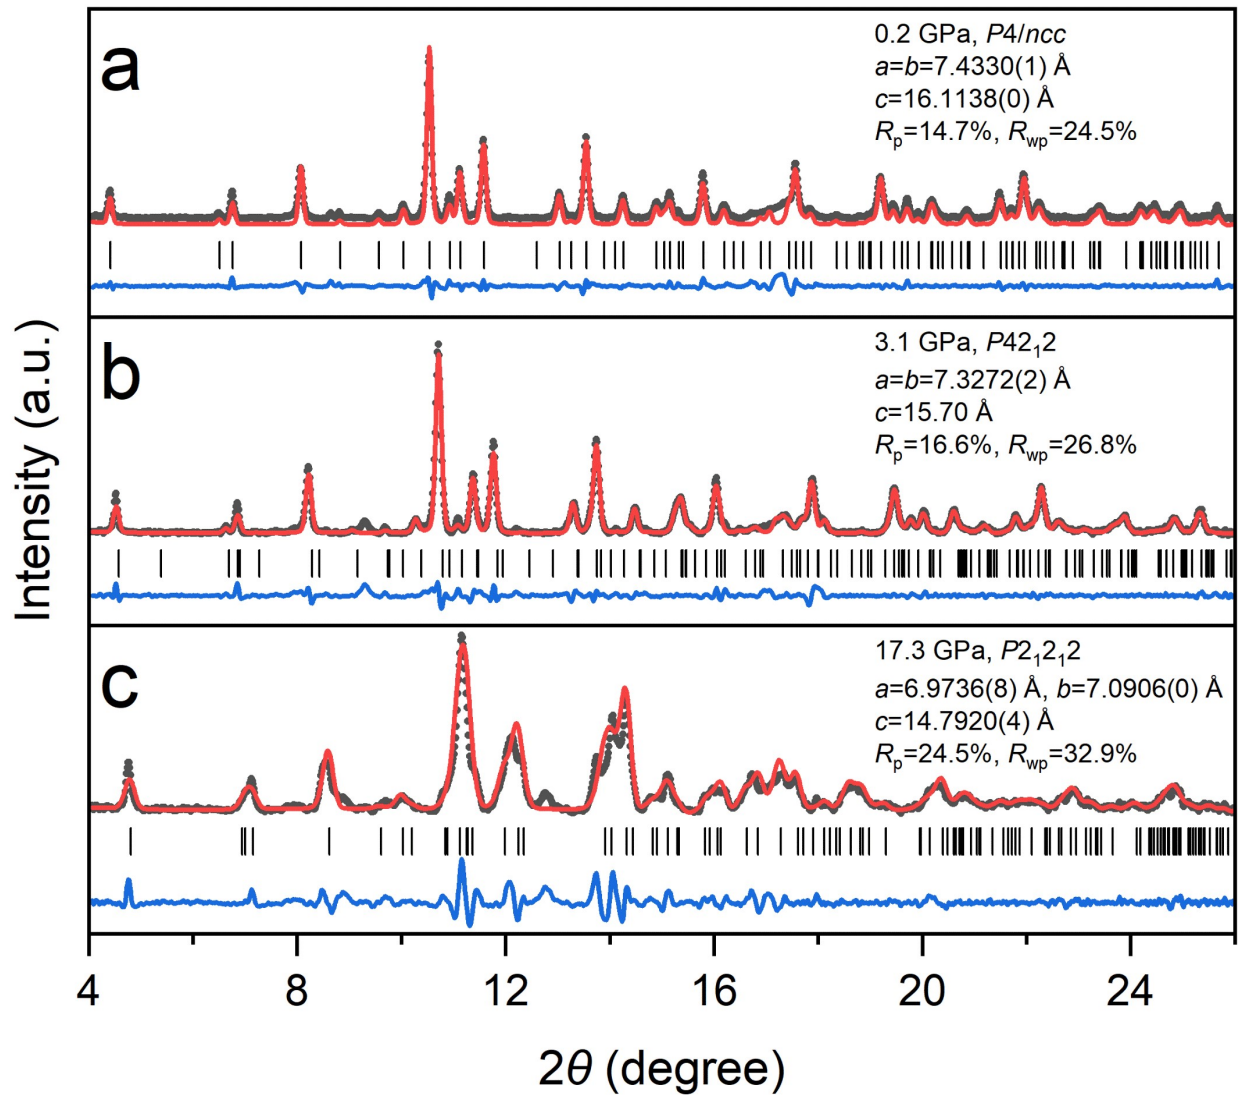

**Figure S7.** LeBail fitting results of BaCuSi<sub>4</sub>O<sub>10</sub> at (a) 0.2 GPa, (b) 3.1 GPa, and (c) 17.3 GPa.

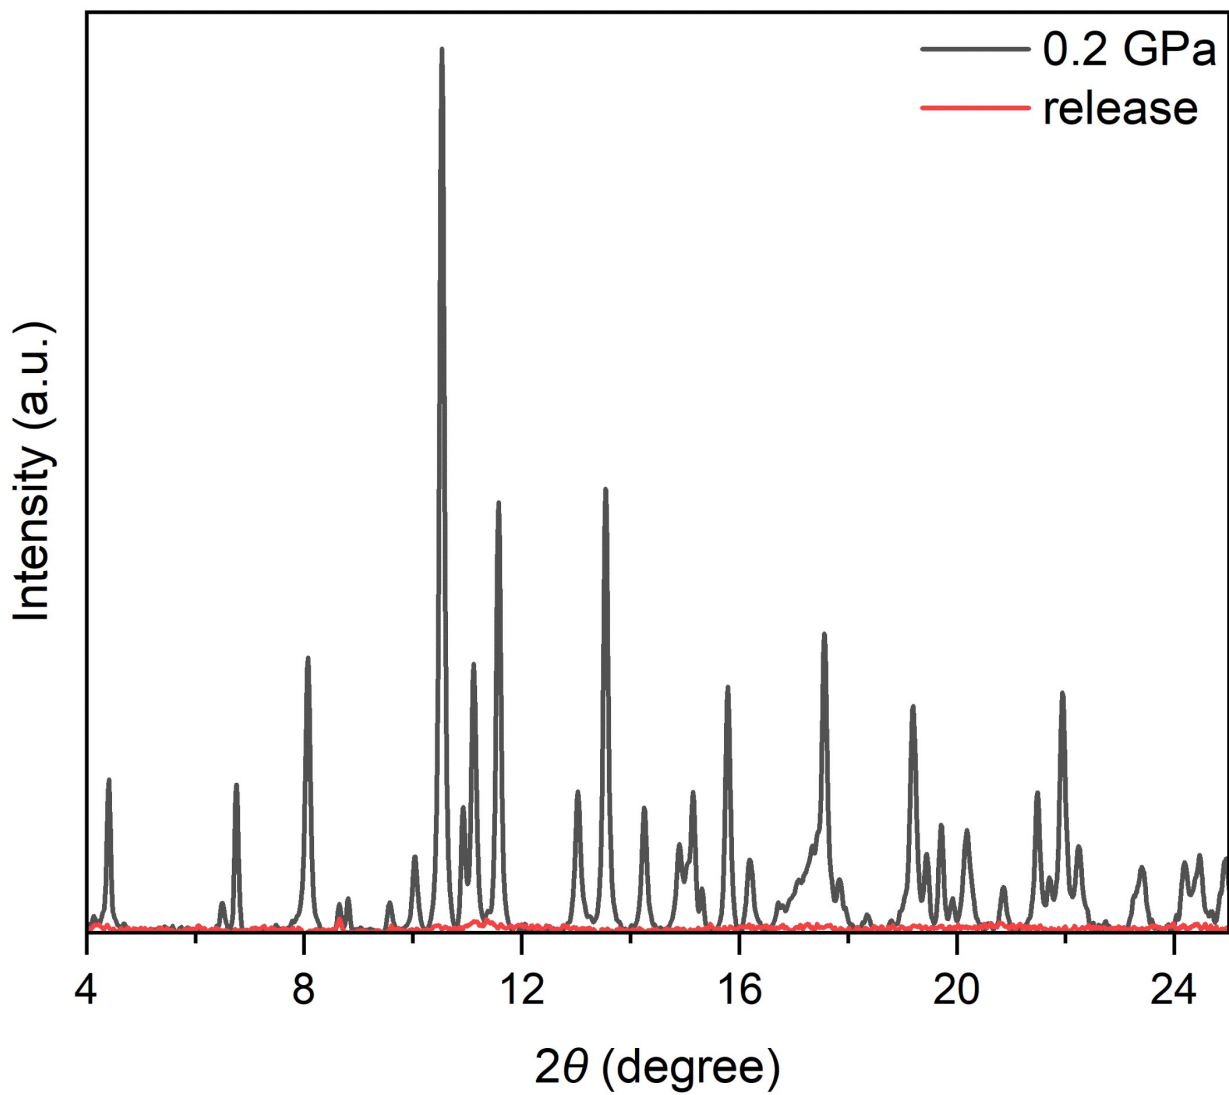

**Figure S8.** XRD patterns of BaCuSi<sub>4</sub>O<sub>10</sub> at 0.2 GPa and after pressure release.

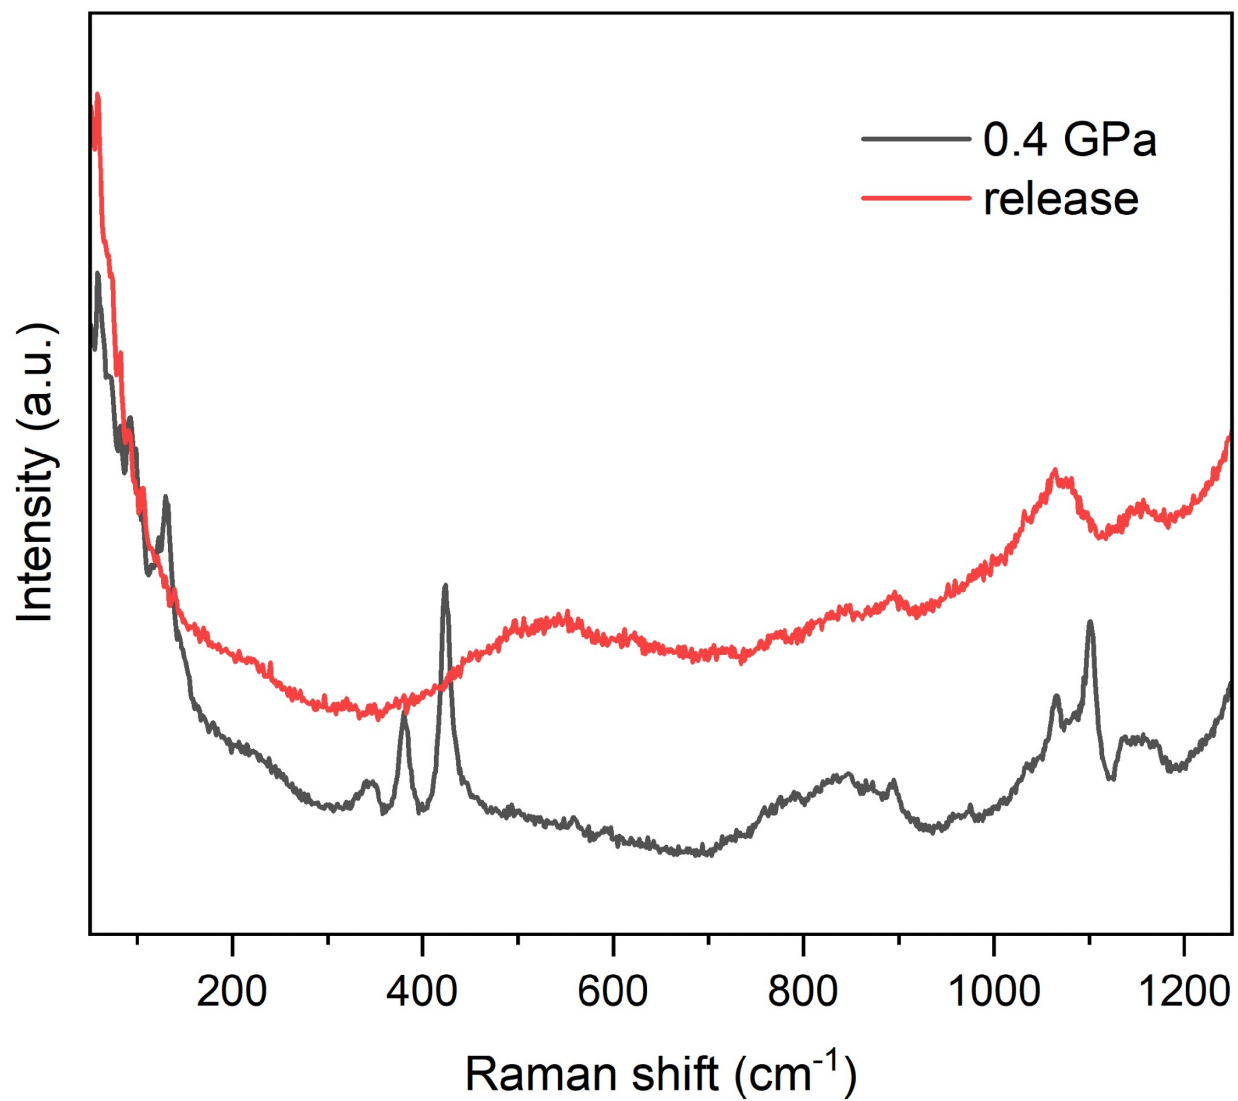

**Figure S9.** The Raman spectra of BaCuSi<sub>4</sub>O<sub>10</sub> at 0.4 GPa and after pressure release.



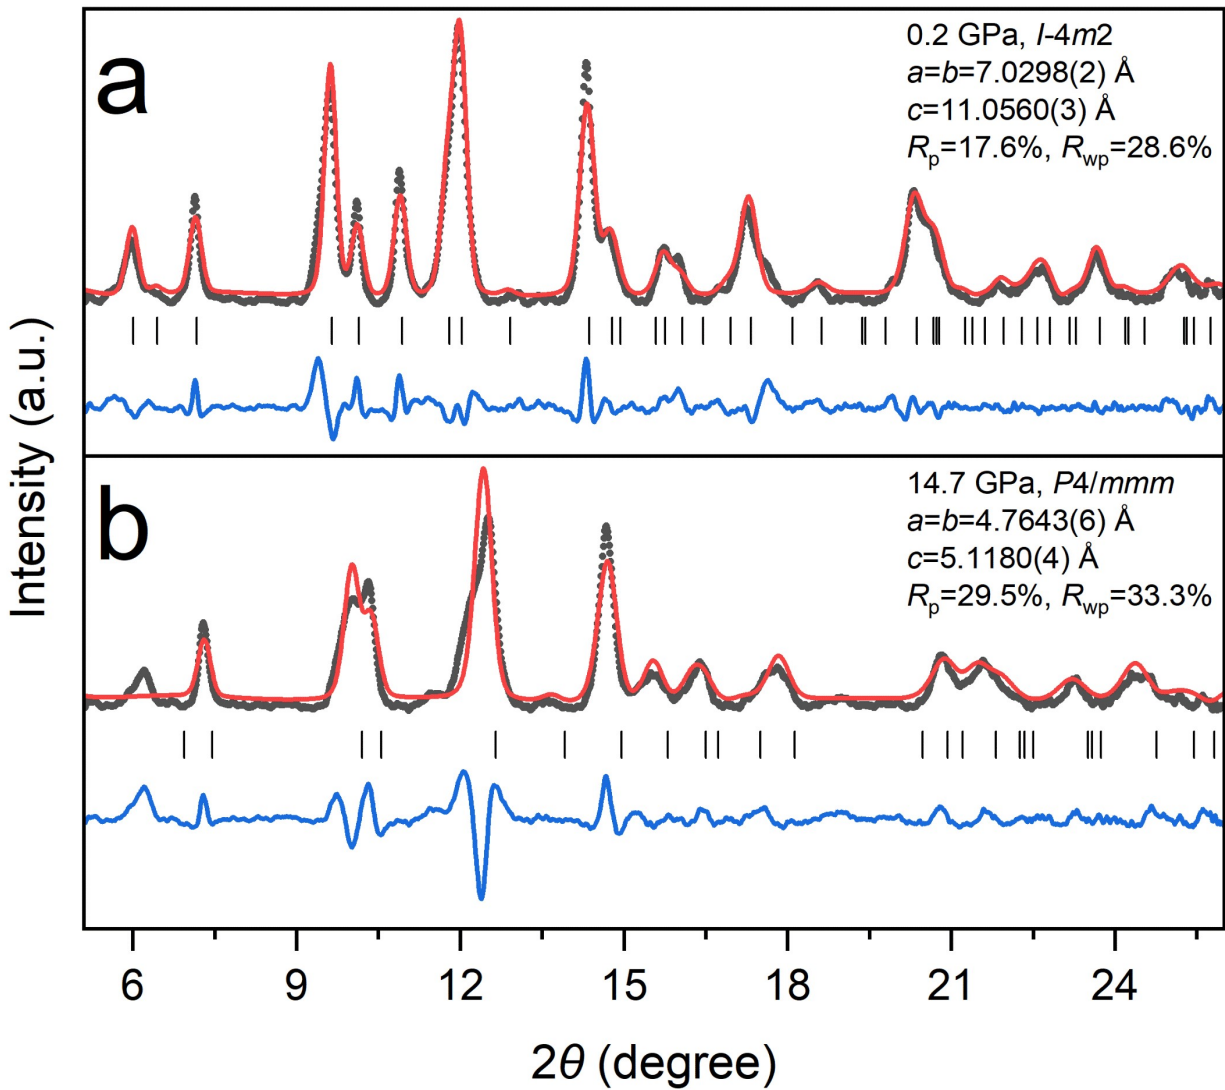

**Figure S10.** LeBail fitting results of BaCuSi<sub>2</sub>O<sub>6</sub> at (a) 0.2 GPa, (b) 14.7 GPa.

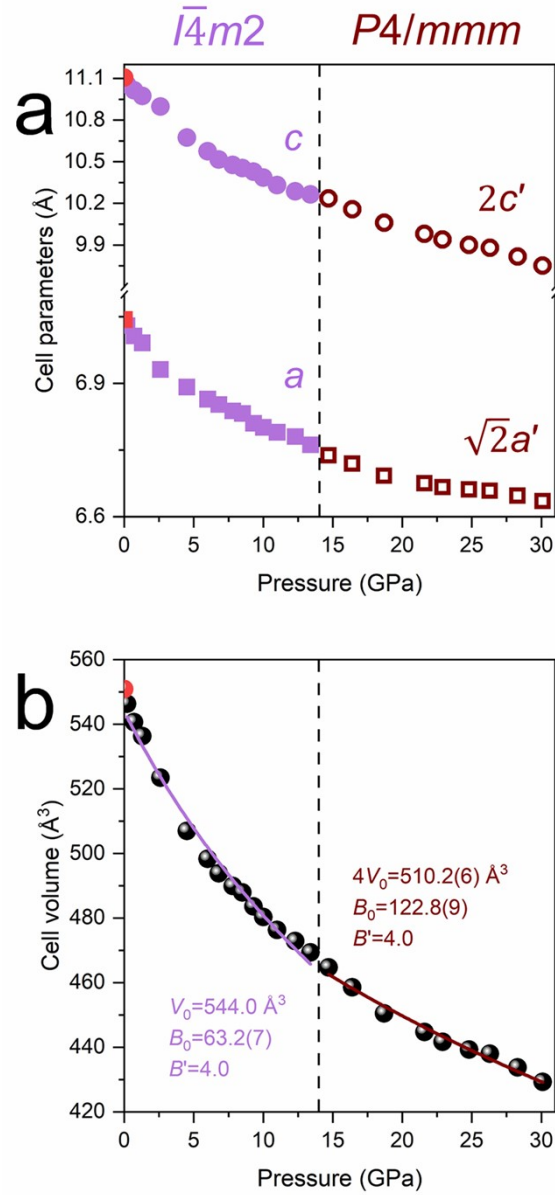

**Figure S11.** (a) *In situ* HP cell parameters of BaCuSi<sub>2</sub>O<sub>6</sub> under selected pressure, and (b) the cell volume as a function of applied pressure.

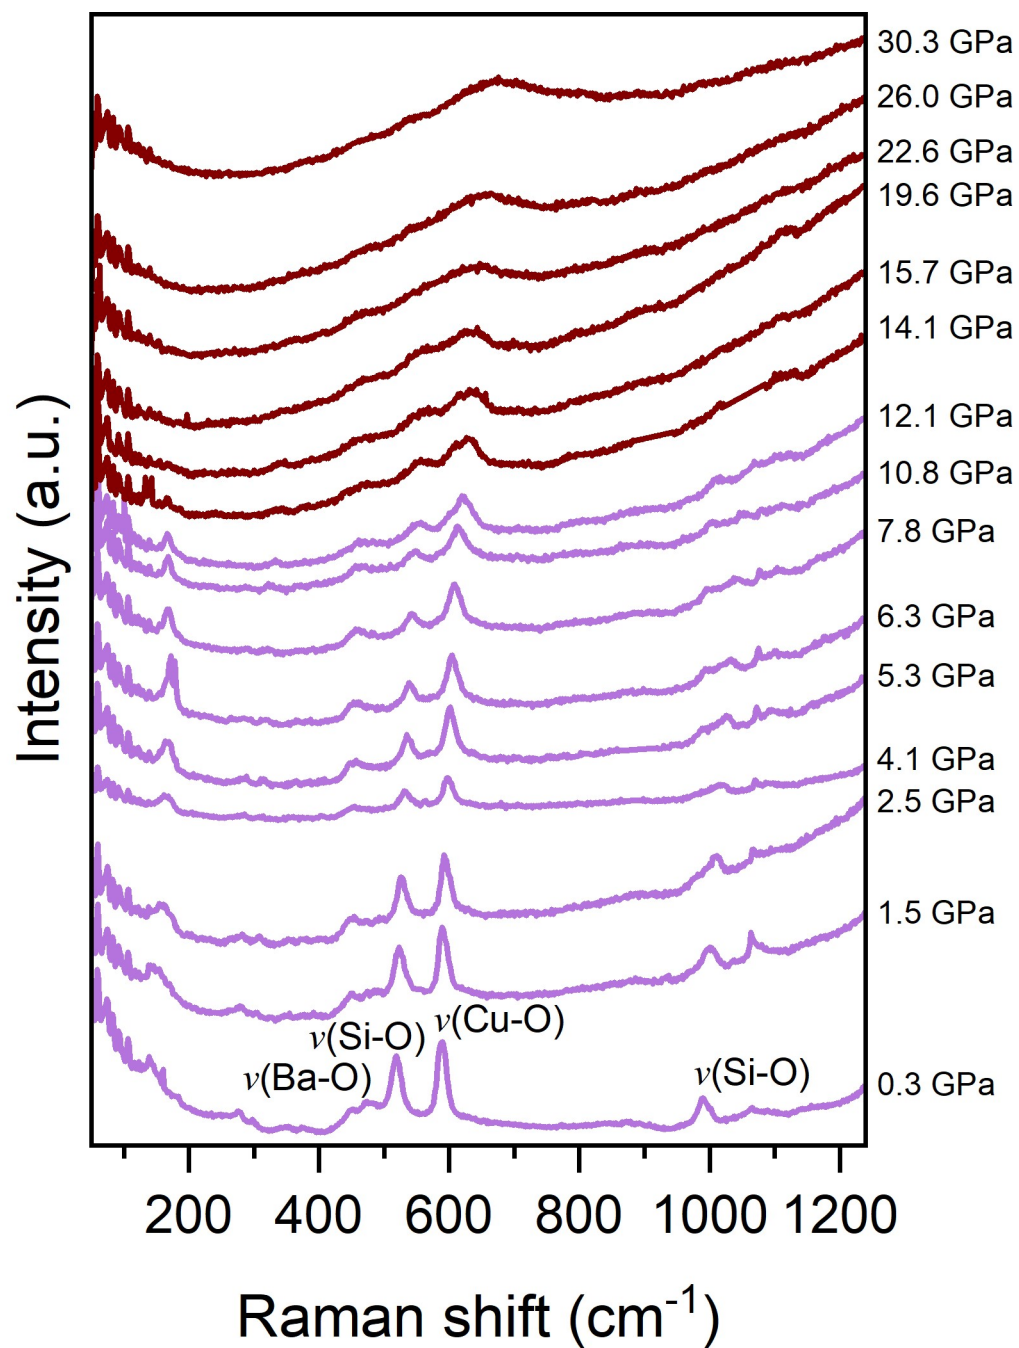

**Figure S12.** *in situ* HP Raman spectra of BaCuSi<sub>2</sub>O<sub>6</sub>.

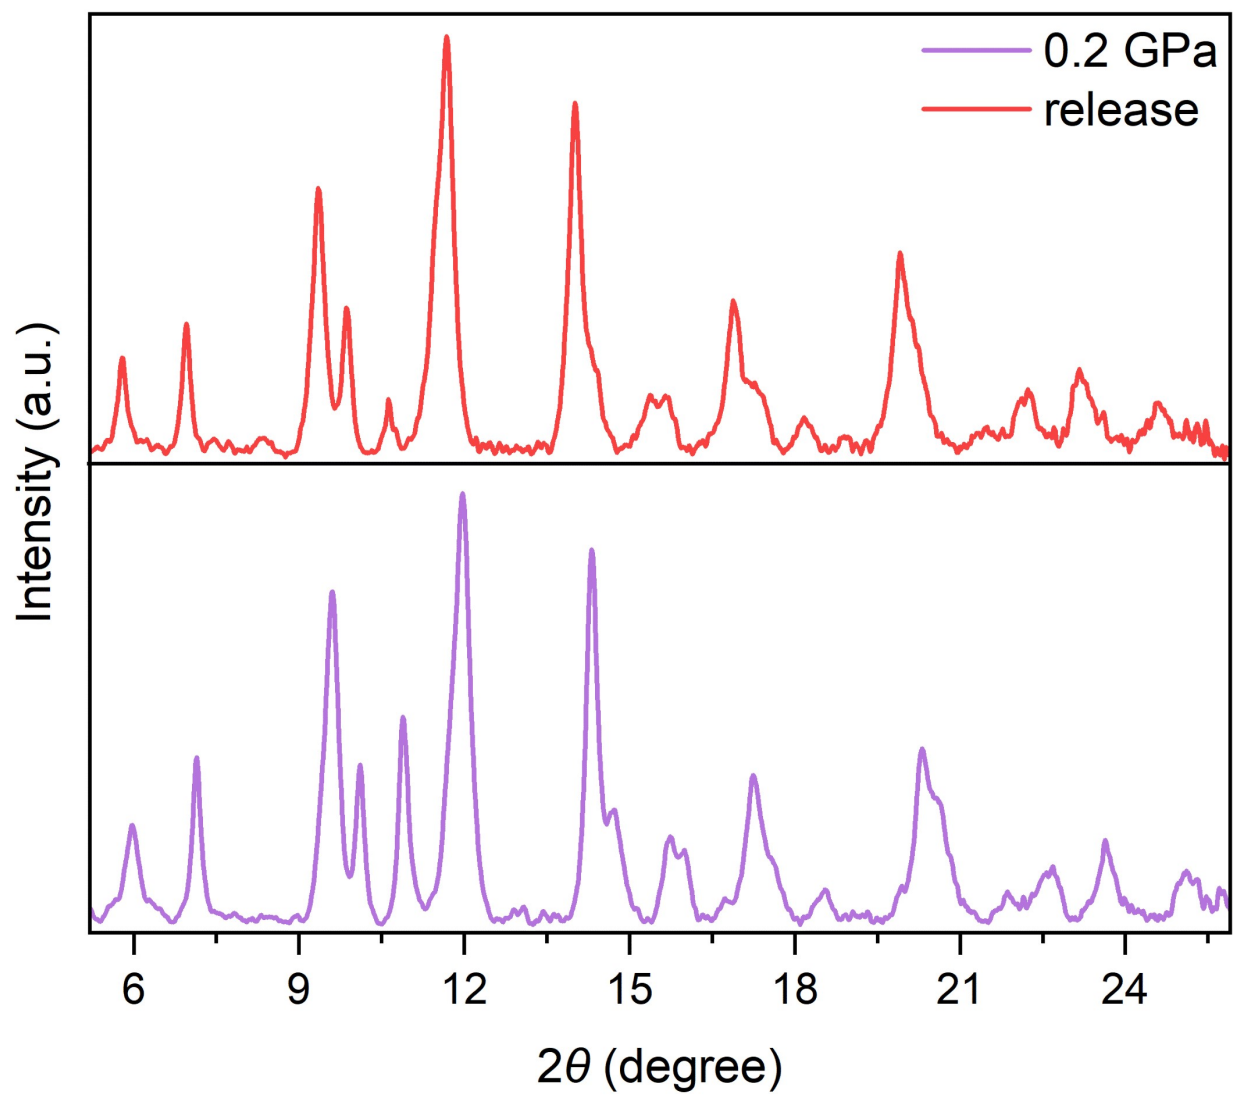

**Figure S13.** XRD patterns of BaCuSi<sub>2</sub>O<sub>6</sub> at 0.2 GPa and after pressure release.

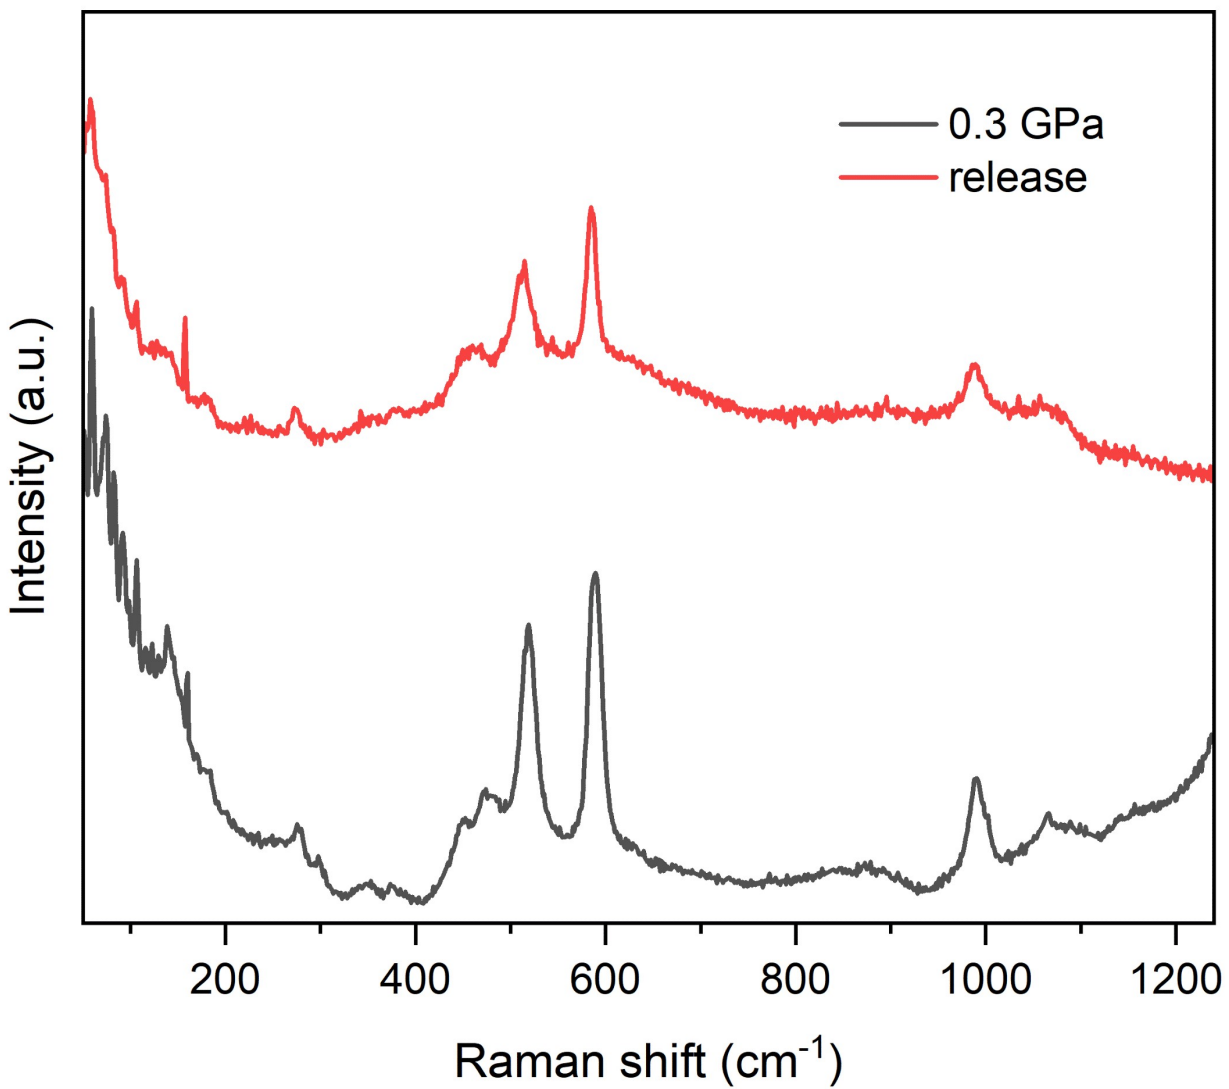

**Figure S14.** The Raman spectra of BaCuSi<sub>2</sub>O<sub>6</sub> at 0.3 GPa and after pressure release.

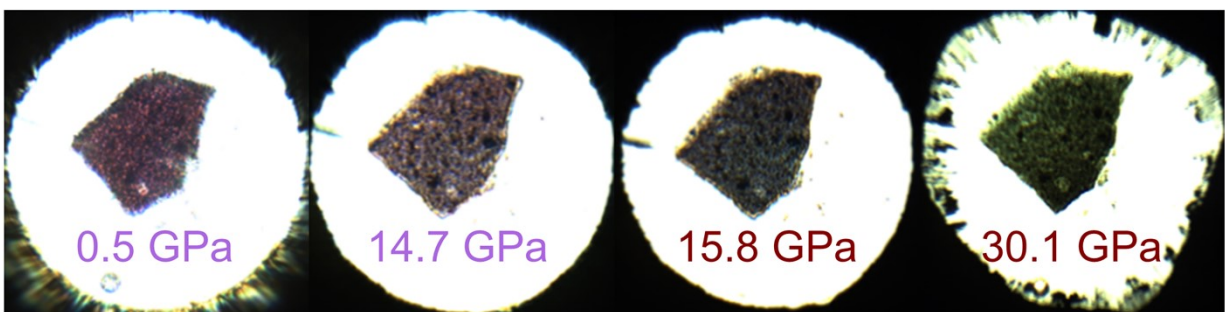

**Figure S15.** Optical photos of BaCuSi<sub>2</sub>O<sub>6</sub> during compression.
